# Supplementary material for: Analysis of Spatial and Temporal Distribution of Purinergic P2 Receptors in the Mouse Hippocampus
Source: MDPI journal article supplement (doi:10.3390/ijms22158078), 2021-07-28
Supplement: s1 [file s1]

### Supplementary Figures:

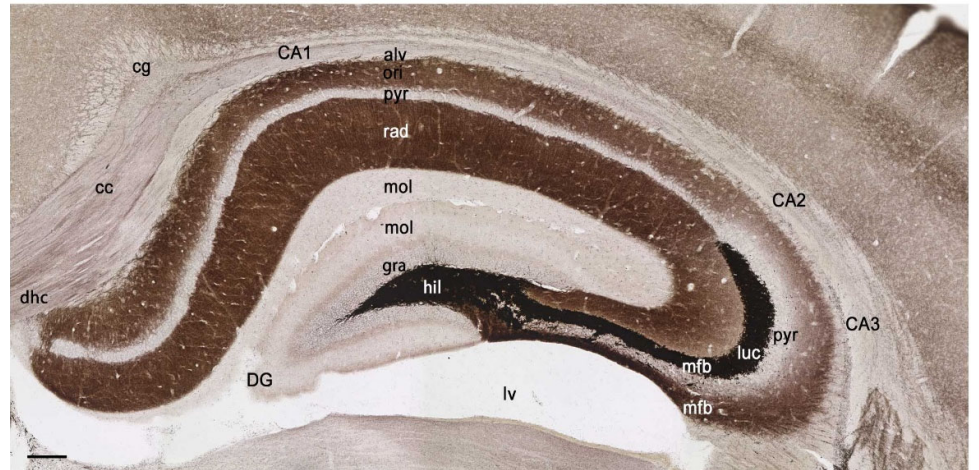

**Figure S1.** Representative microphotograph of mouse hippocampus with mossy fibers visualized by Timm-staining. Abbreviations: alv, alveus; CA, cornu ammonis; cc, corpus callosum; cg, cingulum; DG, dentate gyrus; dhc, dorsal hippocampal commissure; gra, stratum granulare, hil, hilus; lac, stratum lacunosum; luc, stratum lucidum; lv, lateral ventricle, mfb, mossy fiber bundle; mol, stratum moleculare; ori, stratum oriens, pyr, stratum pyramidale, rad, stratum radiatum. Scale bar = 200  $\mu$ m.

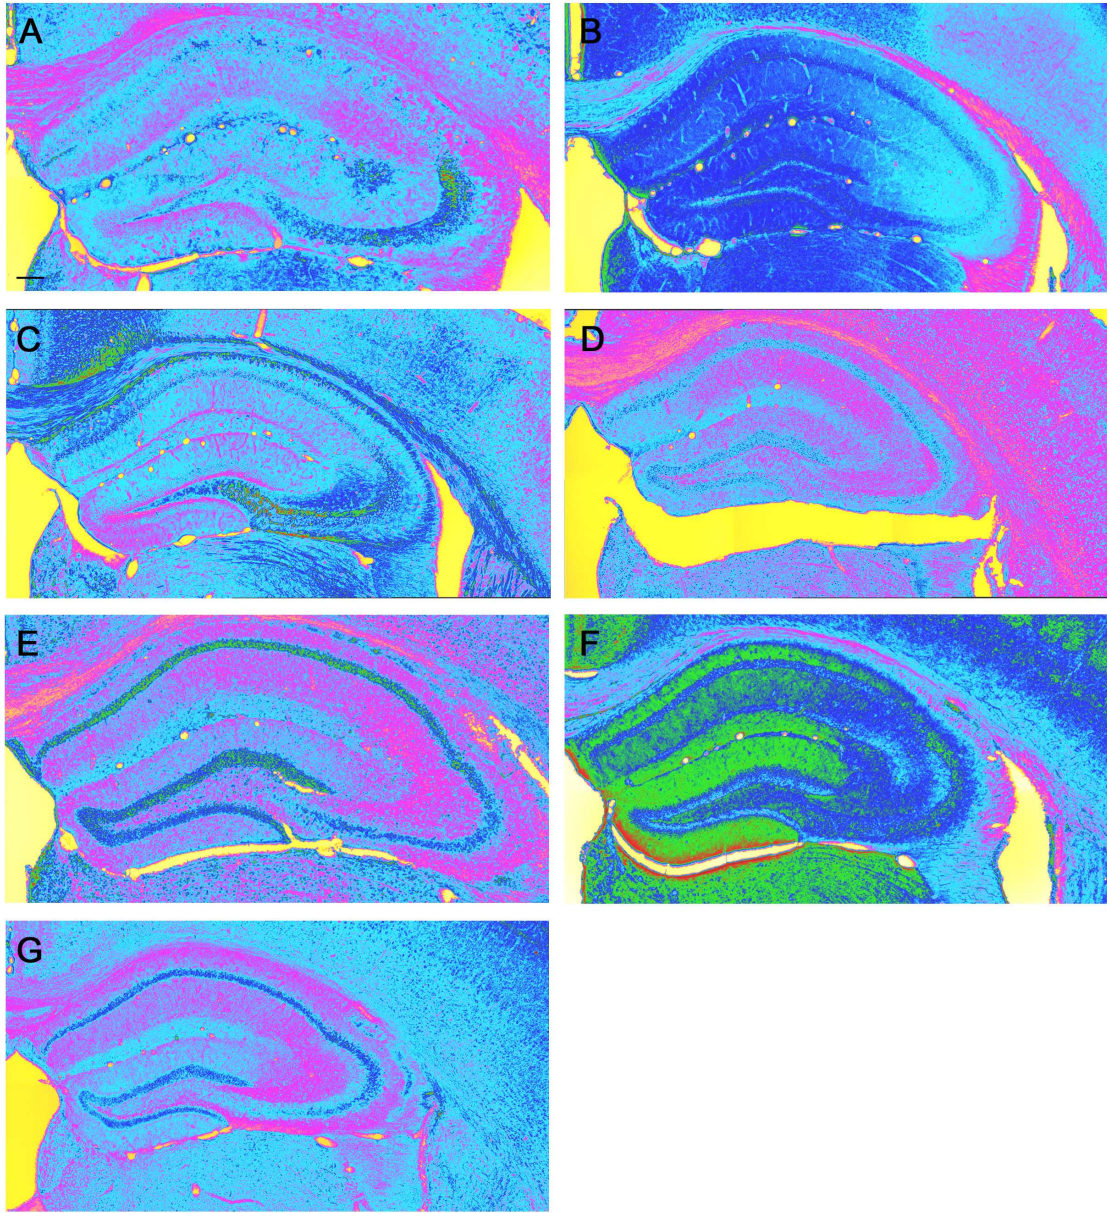

**Figure S2.** Representative pseudocolor images of P2X-immunoreaction in mouse hippocampus. A) P2X1, B) P2X2, C) P2X3, D) P2X4, E) P2X5, F) P2X6, G) P2X7 . Scale bar = 200  $\mu$ m.



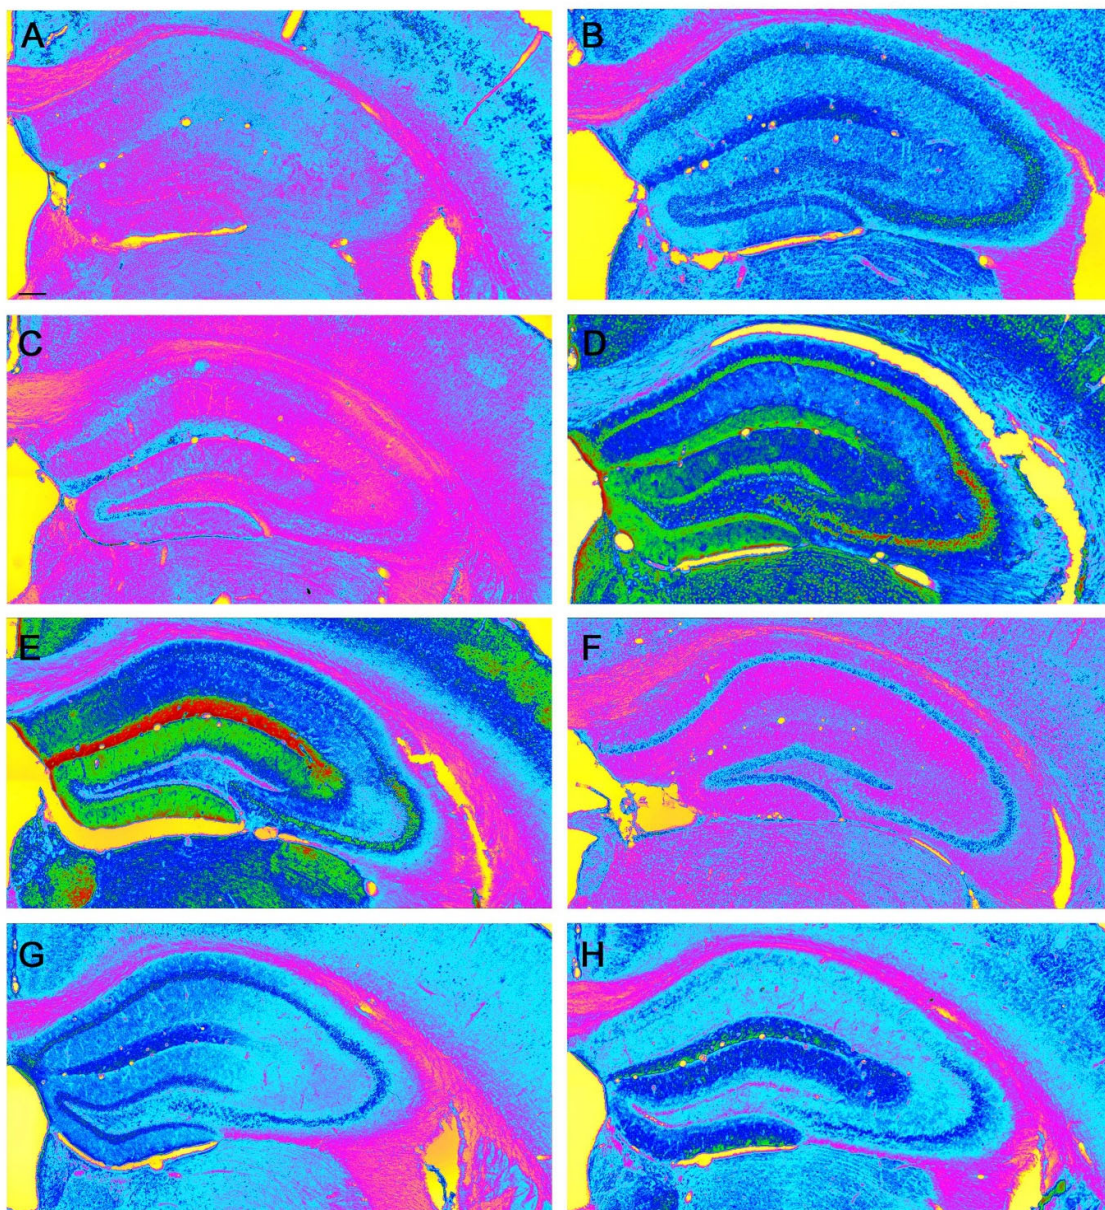

**Figure S3.** Representative pseudocolor images of P2Y-immunoreaction in mouse hippocampus. A) P2Y<sub>1</sub>, B) P2Y<sub>2</sub>, C) P2Y<sub>4</sub>, D) P2Y<sub>6</sub>, E) P2Y<sub>11</sub>, F) P2Y<sub>12</sub>, G) P2Y<sub>13</sub>, H) P2Y<sub>14</sub>. Scale bar = 200  $\mu$ m.
